# Supplementary material for: Evidence for the influence of polaron delocalization on the electrical transport in LiNi0.4+xMn0.4−xCo0.2O2
Source: Royal Society of Chemistry journal article supplement (doi:10.1039/c9cp05768d), 2019-12-23
Supplement: c9cp05768d1.pdf [file c9cp05768d1.pdf]

**Evidence for the influence of polaron delocalization on the  
electrical transport in  $\text{LiNi}_{0.4+x}\text{Mn}_{0.4-x}\text{Co}_{0.2}\text{O}_2$**

Tao Feng,<sup>a</sup> Liping Li,<sup>a</sup> Quan shi,<sup>b</sup> Shengde Dong,<sup>c</sup> Baoyun Li,<sup>a</sup> Ke Li,<sup>a</sup> and Guangshe Li<sup>a\*</sup>

<sup>a</sup> *State Key Laboratory of Inorganic Synthesis and Preparative Chemistry, College of Chemistry, Jilin University, Changchun 130012, PR China*

<sup>b</sup> *Thermochemistry Laboratory, Liaoning Province Key Laboratory of Thermochemistry for Energy and Materials, Dalian Institute of Chemical Physics, Chinese Academy of Sciences, Dalian 116023, PR China*

<sup>c</sup> *Key Laboratory of Comprehensive and Highly Efficient Utilization of Salt Lake Resources, Qinghai Institute of Salt Lakes, Chinese Academy of Sciences, Xining 810008, PR China*

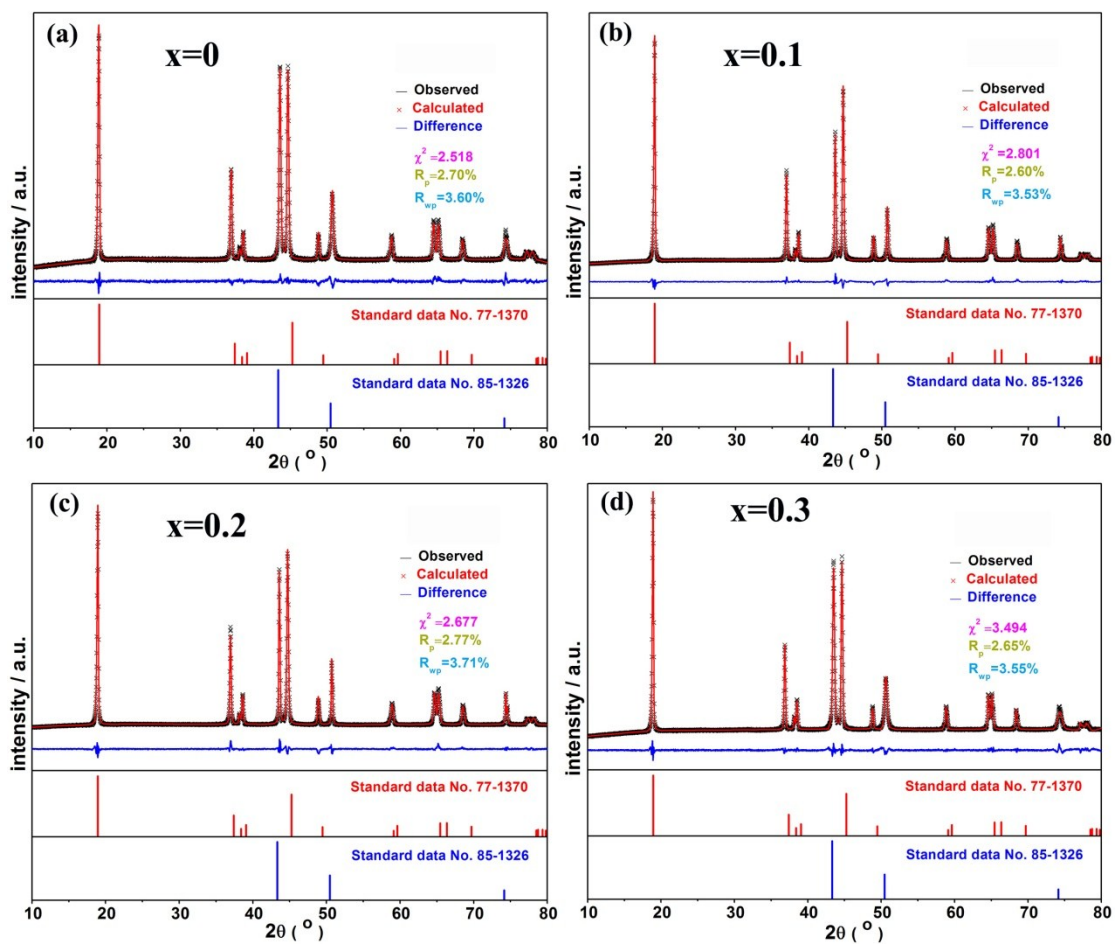

**Figure S1.** Rietveld refinement XRD pattern of the samples (a)  $\text{LiNi}_{0.4}\text{Mn}_{0.4}\text{Co}_{0.2}\text{O}_2$ , (b)  $\text{LiNi}_{0.5}\text{Mn}_{0.3}\text{Co}_{0.2}\text{O}_2$ , (c)  $\text{LiNi}_{0.6}\text{Mn}_{0.2}\text{Co}_{0.2}\text{O}_2$ , and (d)  $\text{LiNi}_{0.7}\text{Mn}_{0.1}\text{Co}_{0.2}\text{O}_2$  based on the hexagonal lattice geometry of the space group  $R\bar{3}m$ .

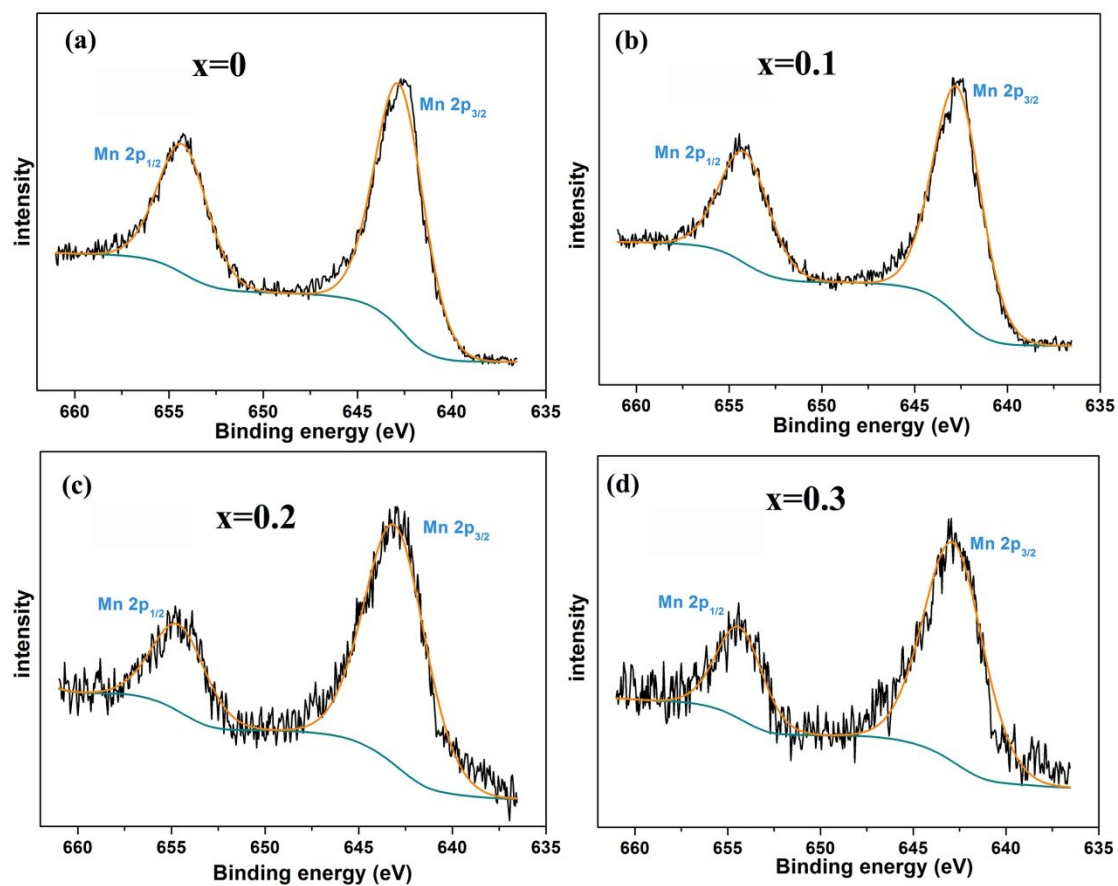

**Figure S2.** Mn 2p X-ray photoelectron spectra of the obtained samples  $\text{LiNi}_{0.4+x}\text{Mn}_{0.4-x}\text{Co}_{0.2}\text{O}_2$  ( $0 \leq x \leq 0.3$ ) with (a)  $x=0$ , (b)  $x=0.1$ , (c)  $x=0.2$ , and (d)  $x=0.3$ .

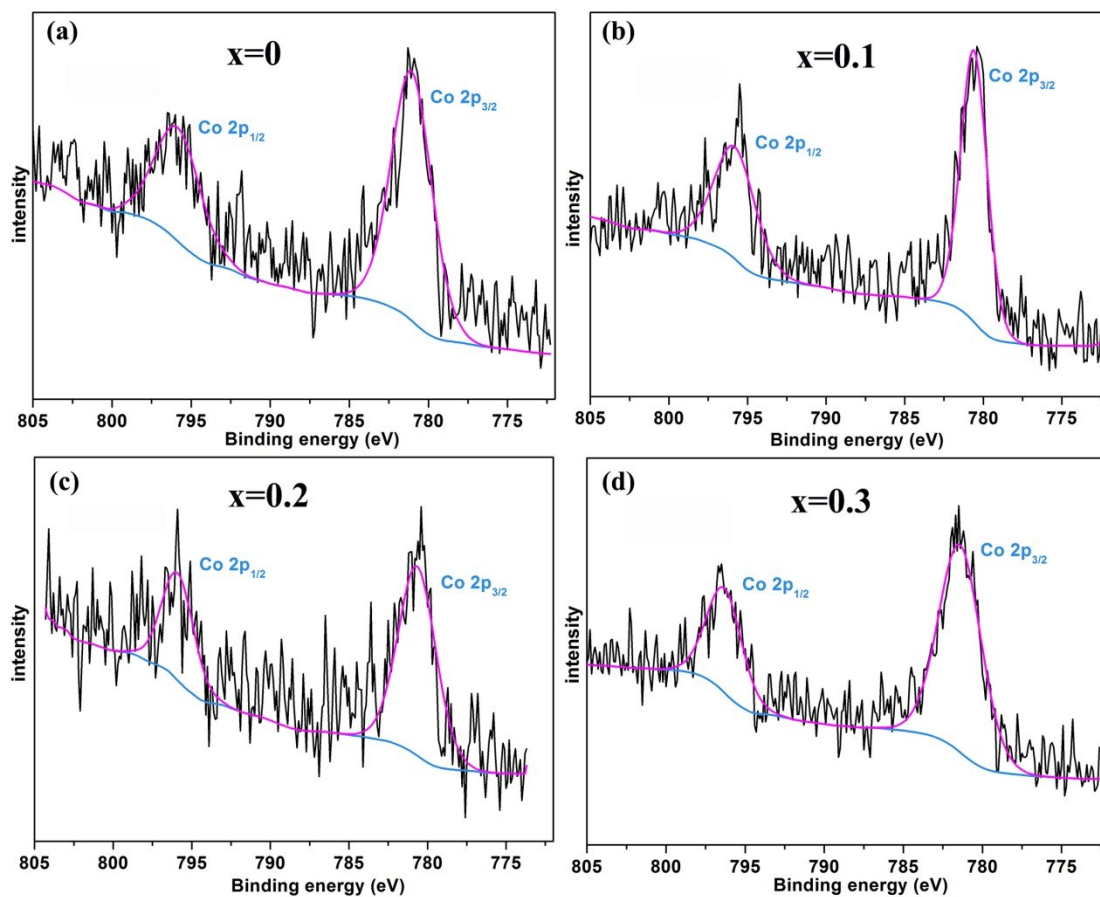

**Figure S3.** Co 2p X-ray photoelectron spectra of the obtained samples  $\text{LiNi}_{0.4+x}\text{Mn}_{0.4-x}\text{Co}_{0.2}\text{O}_2$  ( $0 \leq x \leq 0.3$ ) with (a)  $x=0$ , (b)  $x=0.1$ , (c)  $x=0.2$ , and (d)  $x=0.3$ .

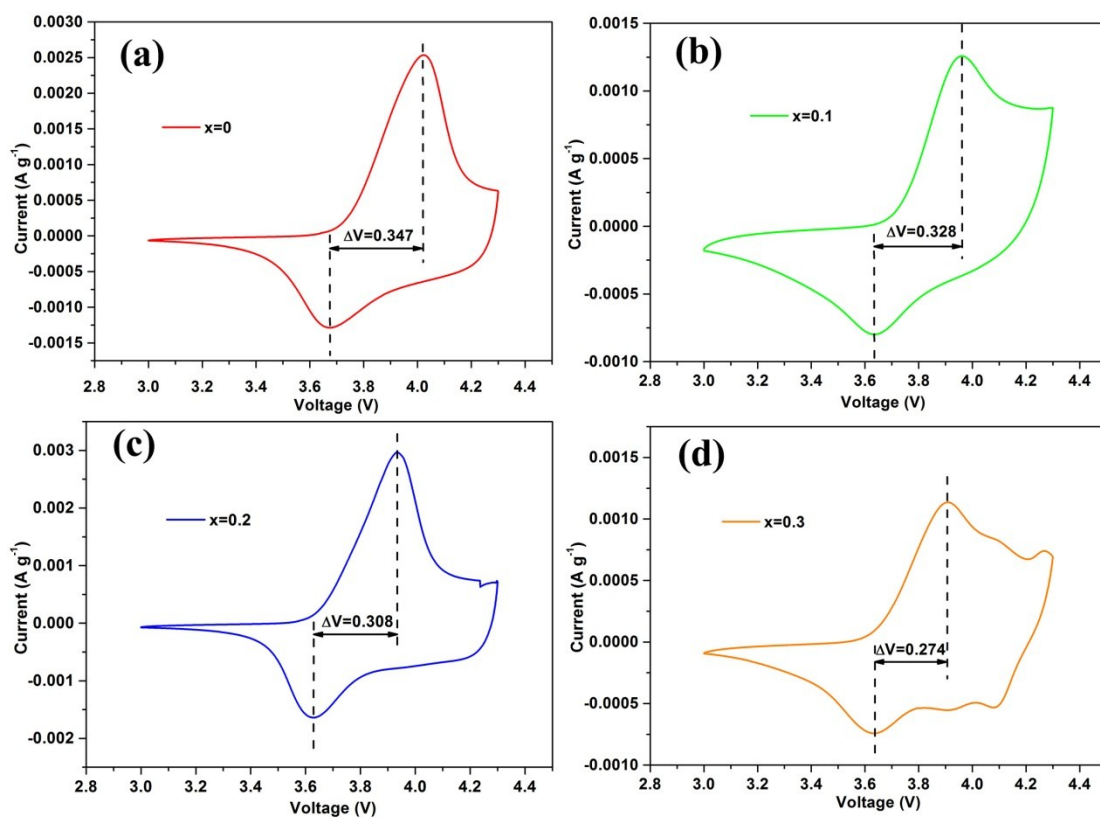

**Figure S4.** Cyclic voltammetry of  $\text{LiNi}_{0.4+x}\text{Mn}_{0.4-x}\text{Co}_{0.2}\text{O}_2$  ( $0 \leq x \leq 0.3$ ) samples with (a)  $x=0$ , (b)  $x=0.1$ , (c)  $x=0.2$ , and (d)  $x=0.3$ .

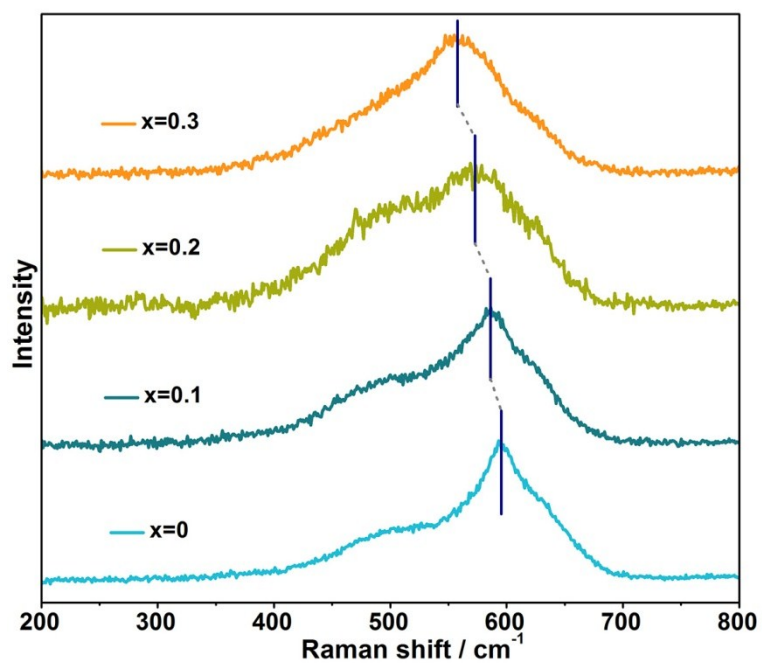

**Figure S5.** Raman spectrum, measured using a laser of 532 nm with the output power of 10 mW, showing the evolution of position of the highest peak for varying the content of Mn in  $\text{LiNi}_{0.4+x}\text{Mn}_{0.4-x}\text{Co}_{0.2}\text{O}_2$  ( $0 \leq x \leq 0.3$ ).

**Table S1.** Refined crystallographic parameters for  $\text{LiNi}_{0.4}\text{Mn}_{0.4}\text{Co}_{0.2}\text{O}_2$  with hexagonal structure.

| $\text{LiNi}_{0.4}\text{Mn}_{0.4}\text{Co}_{0.2}\text{O}_2$ |          |          |          |           |         |
|-------------------------------------------------------------|----------|----------|----------|-----------|---------|
| Atom                                                        | x        | y        | z        | Occupancy | Uiso    |
| Li1                                                         | 0.000000 | 0.000000 | 0.000000 | 0.9702    | 0.01206 |
| Ni1                                                         | 0.000000 | 0.000000 | 0.000000 | 0.0298    | 0.01111 |
| Li2                                                         | 0.000000 | 0.000000 | 0.500000 | 0.0298    | 0.02500 |
| Ni2                                                         | 0.000000 | 0.000000 | 0.500000 | 0.3702    | 0.00973 |
| Co2                                                         | 0.000000 | 0.000000 | 0.500000 | 0.2000    | 0.01092 |
| Mn2                                                         | 0.000000 | 0.000000 | 0.500000 | 0.4000    | 0.00703 |
| O1                                                          | 0.000000 | 0.000000 | 0.243149 | 1.0000    | 0.02500 |

**Table S2.** Refined crystallographic parameters for  $\text{LiNi}_{0.5}\text{Mn}_{0.3}\text{Co}_{0.2}\text{O}_2$  with hexagonal structure.

| $\text{LiNi}_{0.5}\text{Mn}_{0.3}\text{Co}_{0.2}\text{O}_2$ |          |          |          |           |         |
|-------------------------------------------------------------|----------|----------|----------|-----------|---------|
| Atom                                                        | x        | y        | z        | Occupancy | Uiso    |
| Li1                                                         | 0.000000 | 0.000000 | 0.000000 | 0.9647    | 0.01760 |
| Ni1                                                         | 0.000000 | 0.000000 | 0.000000 | 0.0353    | 0.02540 |
| Li2                                                         | 0.000000 | 0.000000 | 0.500000 | 0.0353    | 0.02500 |
| Ni2                                                         | 0.000000 | 0.000000 | 0.500000 | 0.4647    | 0.00120 |
| Co2                                                         | 0.000000 | 0.000000 | 0.500000 | 0.2000    | 0.02500 |
| Mn2                                                         | 0.000000 | 0.000000 | 0.500000 | 0.3000    | 0.02500 |
| O1                                                          | 0.000000 | 0.000000 | 0.243002 | 1.0000    | 0.02500 |



**Table S3.** Refined crystallographic parameters for  $\text{LiNi}_{0.6}\text{Mn}_{0.2}\text{Co}_{0.2}\text{O}_2$  with hexagonal structure.

| $\text{LiNi}_{0.6}\text{Mn}_{0.2}\text{Co}_{0.2}\text{O}_2$ |          |          |          |           |         |
|-------------------------------------------------------------|----------|----------|----------|-----------|---------|
| Atom                                                        | x        | y        | z        | Occupancy | Uiso    |
| Li1                                                         | 0.000000 | 0.000000 | 0.000000 | 0.9485    | 0.05682 |
| Ni1                                                         | 0.000000 | 0.000000 | 0.000000 | 0.0515    | 0.04556 |
| Li2                                                         | 0.000000 | 0.000000 | 0.500000 | 0.0515    | 0.02500 |
| Ni2                                                         | 0.000000 | 0.000000 | 0.500000 | 0.5485    | 0.00110 |
| Co2                                                         | 0.000000 | 0.000000 | 0.500000 | 0.2000    | 0.00266 |
| Mn2                                                         | 0.000000 | 0.000000 | 0.500000 | 0.2000    | 0.02573 |
| O1                                                          | 0.000000 | 0.000000 | 0.244635 | 1.0000    | 0.02500 |

**Table S4.** Refined crystallographic parameters for  $\text{LiNi}_{0.7}\text{Mn}_{0.1}\text{Co}_{0.2}\text{O}_2$  with hexagonal structure.

| $\text{LiNi}_{0.7}\text{Mn}_{0.1}\text{Co}_{0.2}\text{O}_2$ |          |          |          |           |         |
|-------------------------------------------------------------|----------|----------|----------|-----------|---------|
| Atom                                                        | x        | y        | z        | Occupancy | Uiso    |
| Li1                                                         | 0.000000 | 0.000000 | 0.000000 | 0.9292    | 0.11628 |
| Ni1                                                         | 0.000000 | 0.000000 | 0.000000 | 0.0708    | 0.01473 |
| Li2                                                         | 0.000000 | 0.000000 | 0.500000 | 0.0708    | 0.02500 |
| Ni2                                                         | 0.000000 | 0.000000 | 0.500000 | 0.6292    | 0.00176 |
| Co2                                                         | 0.000000 | 0.000000 | 0.500000 | 0.2000    | 0.02459 |
| Mn2                                                         | 0.000000 | 0.000000 | 0.500000 | 0.1000    | 0.02367 |
| O1                                                          | 0.000000 | 0.000000 | 0.243271 | 1.0000    | 0.02500 |

**Table S5.** Refined lattice parameters and error factors of  $\text{LiNi}_{0.4+x}\text{Mn}_{0.4-x}\text{Co}_{0.2}\text{O}_2$  ( $0 \leq x \leq 0.3$ ).

| Sample | $a$ (Å)    | $c$ (Å)    | $V$ (Å <sup>3</sup> ) | $c/a$ | $\alpha/\beta$<br>(deg) | $\gamma$<br>(deg) | $R_p$<br>(%) | $R_{wp}$<br>(%) | $\chi^2$ |
|--------|------------|------------|-----------------------|-------|-------------------------|-------------------|--------------|-----------------|----------|
| NCM442 | 2.87485(4) | 14.2756(3) | 102.177(3)            | 4.966 | 90                      | 120               | 2.70         | 3.60            | 2.518    |
| NCM532 | 2.87238(2) | 14.2532(2) | 101.842(2)            | 4.962 | 90                      | 120               | 2.60         | 3.53            | 2.801    |
| NCM622 | 2.86848(3) | 14.2234(2) | 101.354(2)            | 4.959 | 90                      | 120               | 2.77         | 3.71            | 2.677    |
| NCM712 | 2.86461(3) | 14.1824(3) | 100.788(3)            | 4.951 | 90                      | 120               | 2.65         | 3.55            | 3.494    |

**Table S6.** The theoretical and fitted contents of Ni<sup>2+</sup> and Ni<sup>3+</sup> in LiNi<sub>0.4+x</sub>Mn<sub>0.4-x</sub>Co<sub>0.2</sub>O<sub>2</sub> ( $0 \leq x \leq 0.3$ ).

| Sample | Ni <sup>2+</sup> (Theory) | Ni <sup>3+</sup> (Theory) | Ni <sup>2+</sup> (XPS) | Ni <sup>3+</sup> (theory) |
|--------|---------------------------|---------------------------|------------------------|---------------------------|
| NCM442 | 0.40 mol                  | 0.00 mol                  | 0.40 mol               | 0.00 mol                  |
| NCM532 | 0.30 mol                  | 0.20 mol                  | 0.29 mol               | 0.21 mol                  |
| NCM622 | 0.20 mol                  | 0.40 mol                  | 0.18 mol               | 0.42 mol                  |
| NCM712 | 0.10 mol                  | 0.60 mol                  | 0.11 mol               | 0.59 mol                  |

**Table S7.** Parameters of constant susceptibility  $\chi_0$ , Curie-Weiss temperature  $T_\theta$ , Curie-Weiss constant  $C$ , effective magnetic moment  $\mu_{exp}$  and  $\mu_{theory}$  for  $\text{LiNi}_{0.4+x}\text{Mn}_{0.4-x}\text{Co}_{0.2}\text{O}_2$  ( $0 \leq x \leq 0.3$ ). The  $\mu_{exp}$  is derived from the Curie-Weiss fit and the  $\mu_{theory}$  is calculated with the spin-only effective magnetic moment of transition metal ions.

| Sample | $\chi_0$<br>(emu Oe <sup>-1</sup> mol <sup>-1</sup> ) | $C$<br>(K emu Oe <sup>-1</sup> mol <sup>-1</sup> ) | $T_\theta$<br>(K) | $\mu_{exp}$<br>( $\mu_B$ ) | $\mu_{theory}$<br>( $\mu_B$ ) |
|--------|-------------------------------------------------------|----------------------------------------------------|-------------------|----------------------------|-------------------------------|
| NCM442 | 3.1x10 <sup>-4</sup>                                  | 1.128                                              | -58.2             | 3.00                       | 3.03                          |
| NCM532 | 3.4x10 <sup>-4</sup>                                  | 0.970                                              | -85.6             | 2.78                       | 2.74                          |
| NCM622 | 3.7x10 <sup>-4</sup>                                  | 0.806                                              | -36.9             | 2.54                       | 2.41                          |
| NCM712 | 9.3x10 <sup>-5</sup>                                  | 0.502                                              | 23.2              | 2.00                       | 2.02                          |

**Table S8.** Parameters of six deconvoluted bands ( $A_g$  and  $E_g$ ) of the Raman spectra for  $\text{LiNi}_{0.4+x}\text{Mn}_{0.4-x}\text{Co}_{0.2}\text{O}_2$  ( $0 \leq x \leq 0.3$ ) compounds.

|                  | NMC442                           |                              |                   | NMC532                           |                              |                   | NMC622                           |                              |                   | NMC712                           |                              |                   |
|------------------|----------------------------------|------------------------------|-------------------|----------------------------------|------------------------------|-------------------|----------------------------------|------------------------------|-------------------|----------------------------------|------------------------------|-------------------|
|                  | position<br>( $\text{cm}^{-1}$ ) | FWHM<br>( $\text{cm}^{-1}$ ) | Peak<br>area      | position<br>( $\text{cm}^{-1}$ ) | FWHM<br>( $\text{cm}^{-1}$ ) | Peak<br>area      | position<br>( $\text{cm}^{-1}$ ) | FWHM<br>( $\text{cm}^{-1}$ ) | Peak<br>area      | position<br>( $\text{cm}^{-1}$ ) | FWHM<br>( $\text{cm}^{-1}$ ) | Peak<br>area      |
| $E_g(\text{Ni})$ | 465.6                            | 47.9                         | $1.0 \times 10^4$ | 460.7                            | 51.9                         | $1.4 \times 10^4$ | 456.6                            | 57.9                         | $1.6 \times 10^4$ | 450.6                            | 60.1                         | $1.7 \times 10^4$ |
| $E_g(\text{Co})$ | 499.0                            | 48.1                         | $1.1 \times 10^4$ | 493.8                            | 49.9                         | $1.3 \times 10^4$ | 489.9                            | 58.1                         | $1.3 \times 10^4$ | 483.8                            | 61.8                         | $1.2 \times 10^4$ |
| $E_g(\text{Mn})$ | 526.9                            | 45.9                         | $1.3 \times 10^4$ | 521.9                            | 52.0                         | $1.3 \times 10^4$ | 518.0                            | 55.9                         | $1.2 \times 10^4$ | 511.9                            | 59.8                         | $1.0 \times 10^4$ |
| $A_g(\text{Ni})$ | 572.4                            | 46.0                         | $3.0 \times 10^4$ | 566.5                            | 50.0                         | $3.4 \times 10^4$ | 555.4                            | 59.8                         | $3.6 \times 10^4$ | 548.4                            | 65.8                         | $4.9 \times 10^4$ |
| $A_g(\text{Co})$ | 596.3                            | 32.7                         | $3.5 \times 10^4$ | 591.5                            | 41.9                         | $3.3 \times 10^4$ | 584.5                            | 45.9                         | $3.5 \times 10^4$ | 579.4                            | 60.3                         | $3.1 \times 10^4$ |
| $A_g(\text{Mn})$ | 628.9                            | 45.9                         | $3.4 \times 10^4$ | 624.9                            | 50.1                         | $3.0 \times 10^4$ | 621.0                            | 55.9                         | $2.8 \times 10^4$ | 614.9                            | 60.1                         | $1.2 \times 10^4$ |
